# Supplementary material for: Plant-based dietary patterns and their association with mood in healthy individuals
Source: Royal Society of Chemistry journal article supplement (doi:10.1039/d2fo02951k), 2022-12-29
Supplement: d2fo02951k1.pdf [file d2fo02951k1.pdf]

## Supplementary Materials

**Table S1 Food items constituting the food groups and scoring criteria in PDI, hPDI and uPDI**

| <b>Healthy</b>            | Food groups                                                                         | PDI                                                                              | hPDI                                                                             | uPDI                                                                             |
|---------------------------|-------------------------------------------------------------------------------------|----------------------------------------------------------------------------------|----------------------------------------------------------------------------------|----------------------------------------------------------------------------------|
| Whole grains              | Cereal, oatmeal, dark bread, etc.                                                   | Q1 = 1 point<br>Q2 = 2 points<br>Q3 = 3 points<br>Q4 = 4 points<br>Q5 = 5 points | Q1 = 1 point<br>Q2 = 2 points<br>Q3 = 3 points<br>Q4 = 4 points<br>Q5 = 5 points | Q1 = 5 points<br>Q2 = 4 points<br>Q3 = 3 points<br>Q4 = 2 points<br>Q5 = 1 point |
| Fruits                    | Apples, bananas, melon, grapefruit, berries, citrus, apricots, fruit cocktail, etc. |                                                                                  |                                                                                  |                                                                                  |
| Vegetables                | Broccoli, cabbage, lettuce, mushrooms, carrots, avocado, etc.                       |                                                                                  |                                                                                  |                                                                                  |
| Nuts                      | Hazelnuts, peanuts, peanut butter                                                   |                                                                                  |                                                                                  |                                                                                  |
| Legumes                   | Tofu, soybeans, beans or lentils and peas                                           |                                                                                  |                                                                                  |                                                                                  |
| Vegetable oils            | All vegetable oils used for cooking                                                 |                                                                                  |                                                                                  |                                                                                  |
| Tea & Coffee              | Tea and coffee                                                                      |                                                                                  |                                                                                  |                                                                                  |
| <b>Less healthy</b>       |                                                                                     |                                                                                  |                                                                                  |                                                                                  |
| Fruit juices              | Apple juice and orange juice                                                        | Q1 = 5 points<br>Q2 = 4 points<br>Q3 = 3 points<br>Q4 = 2 points<br>Q5 = 1 point | Q1 = 5 points<br>Q2 = 4 points<br>Q3 = 3 points<br>Q4 = 2 points<br>Q5 = 1 point | Q1 = 1 point<br>Q2 = 2 points<br>Q3 = 3 points<br>Q4 = 4 points<br>Q5 = 5 points |
| Refined grains            | White bread, white rice, white spaghetti, digestive biscuits, etc.                  |                                                                                  |                                                                                  |                                                                                  |
| Potatoes                  | Potato chips, baked, salad or mashed potatoes, potato crisps                        |                                                                                  |                                                                                  |                                                                                  |
| Sugar sweetened beverages | Soft drinks and concentrated fruit drinks                                           |                                                                                  |                                                                                  |                                                                                  |
| Sweets and Desserts       | Chocolates, sweets, pudding, doughnuts, cake, pie, etc.                             |                                                                                  |                                                                                  |                                                                                  |
| <b>Animal Food Groups</b> |                                                                                     |                                                                                  |                                                                                  |                                                                                  |
| Animal fat                | Butter and lard used for cooking                                                    | Q1 = 5 points                                                                    | Q1 = 5 points                                                                    | Q1 = 5 points                                                                    |
| Dairy                     | Milk, cream, ice cream, yogurt, cheese                                              | Q2 = 4 points                                                                    | Q2 = 4 points                                                                    | Q2 = 4 points                                                                    |
| Egg                       | Eggs                                                                                | Q3 = 3 points                                                                    | Q3 = 3 points                                                                    | Q3 = 3 points                                                                    |
|                           |                                                                                     | Q4 = 2 points                                                                    | Q4 = 2 points                                                                    | Q4 = 2 points                                                                    |

|                          |                                                         |              |              |              |
|--------------------------|---------------------------------------------------------|--------------|--------------|--------------|
| Fish or Seafood          | Tuna, salmon, fish, prawns, mussel, crab, etc           | Q5 = 1 point | Q5 = 1 point | Q5 = 1 point |
| Meat                     | Poultry, bacon, liver, sausages, beef, pork, lamb, etc. |              |              |              |
| Misc. animal-based foods | Cream soup, creamy salad dressing, oxtail soup, quiche  |              |              |              |

**Note: Abbreviations: PDI, Plant-based diet index; hPDI, Healthful Plant-based diet index; uPDI, Unhealthful Plant-based diet index; Q, quintile.**

**Table S2 Food items constituting the eight food groups in DASH and its scoring system**

| Components              | Foods                                                                                                          | Scoring                                                                          |
|-------------------------|----------------------------------------------------------------------------------------------------------------|----------------------------------------------------------------------------------|
| Whole grains            | Cereal, oatmeal, dark bread, etc.                                                                              | Q1 = 1 point<br>Q2 = 2 points<br>Q3 = 3 points<br>Q4 = 4 points<br>Q5 = 5 points |
| Fruits                  | Apples, bananas, melon, grapefruit, berries, citrus, apricots, fruit cocktail, apple juice, orange juice, etc. |                                                                                  |
| Vegetables              | Broccoli, cabbage, lettuce, mushrooms, carrots, avocado, etc.                                                  |                                                                                  |
| Nuts and legumes        | Hazelnuts, peanuts, peanut butter, tofu, soybeans, beans or lentils and peas                                   |                                                                                  |
| Low-fat dairy           | Skimmed/semi-skimmed milk, low-fat yogurt, cottage cheese                                                      |                                                                                  |
| Red and processed meats | Bacon, liver, sausages, beef, pork, lamb, etc.                                                                 | Q1 = 5 points<br>Q2 = 4 points<br>Q3 = 3 points<br>Q4 = 2 points<br>Q5 = 1 point |
| Sweetened beverages     | Soft drink                                                                                                     |                                                                                  |
| Sodium                  | Sum of sodium in FFQ                                                                                           |                                                                                  |

**Note: Abbreviations: DASH, Dietary Approaches to Stop Hypertension Diet; Q, quintile.**

**Table S3 Food items of each component of Mediterranean-DASH Intervention for Neurodegenerative Delay (MIND) Diet and scoring system**

| <b>Brain healthy foods</b>   |                                                                                                           | Scoring 0           | Scoring 0.5      | Scoring 1        |
|------------------------------|-----------------------------------------------------------------------------------------------------------|---------------------|------------------|------------------|
| Green leafy vegetables       | Cabbage, lettuce, spinach, coleslaw, watercress, etc.                                                     | ≤2 servings/wk      | > 2 to <6/wk     | ≥6 servings/wk   |
| Other vegetables             | Potatoes, peppers, carrots, broccoli, peas, avocado, etc.                                                 | <5 serving/wk       | 5 – <7 wk        | ≥1 serving/day   |
| Berries                      | Strawberries, raspberries                                                                                 | <1 serving/wk       | 1-2 /wk          | ≥2 servings/wk   |
| Nuts                         | Hazelnuts, peanuts, peanut butter                                                                         | <1/mo               | 1/mo – <5/wk     | ≥5 servings/wk   |
| Olive oil                    | Olive oil used for cooking and dressing                                                                   | Not primary oil     |                  | Primary oil used |
| Whole grains                 | Cereal, oatmeal, dark bread, etc.                                                                         | <1 serving/d        | 1–3 /d           | ≥3 servings/d    |
| Fish (not fried)             | Fish and seafood without being fried                                                                      | Rarely              | 1–3 /mo          | ≥1 meals/wk      |
| Beans                        | Beans, lentils, tofu, soybeans, etc.                                                                      | <1 meal/wk          | 1–3/wk           | >3 meals/wk      |
| Poultry                      | Chicken, turkey                                                                                           | <1 meal/wk          | 1-2 /wk          | ≥2 meals/wk      |
| <b>Brain unhealthy foods</b> |                                                                                                           |                     |                  |                  |
| Butter, margarine            | Butter, margarine, lard                                                                                   | >2 Teaspoons /d     | 1–2 teaspoons /d | <1 Teaspoon /d   |
| Cheese                       | Cheese and cheese sauce                                                                                   | 7+ servings/wk      | 1–6 /wk          | < 1 serving/wk   |
| Red meat and products        | Bacon, liver, sausages, beef, pork, lamb, etc.                                                            | 7+ meals/wk         | 4–6 /wk          | < 4 meals/wk     |
| Fast fried foods             | Fried chips and cod, fish fingers                                                                         | 4+ times/wk         | 1–3 /wk          | <1 time/wk       |
| Pastries and sweets          | Digestive biscuits, cake, fruit pies, ice cream, chocolate bars, croissants, cream crackers, scones, etc. | 7+ servings/wk      | 5 – 6 /wk        | <5 servings/wk   |
| Wine                         | Rose wine, vermouth                                                                                       | >1 glass/d or never | 1/mo – 6/wk      | 1 glass/d        |

**Table S4 Food items of each component of Original Mediterranean Diet Index (oMED) and scoring criteria**

| Components                    | Foods                                                                                                                                             | Scoring 0                            | Scoring 1                          |
|-------------------------------|---------------------------------------------------------------------------------------------------------------------------------------------------|--------------------------------------|------------------------------------|
| <b>Beneficial components</b>  |                                                                                                                                                   |                                      |                                    |
| Fruits and nuts               | Apples, bananas, melon, grapefruit, berries, citrus, apricots, fruit cocktail, apple juice, orange juice, hazelnuts, peanuts, peanut butter, etc. | < median                             | > median                           |
| Vegetables                    | Potatoes, broccoli, cabbage, lettuce, mushrooms, carrots, avocado, potatoes, etc.                                                                 | < median                             | > median                           |
| Legumes                       | Tofu, soybeans, beans or lentils and peas                                                                                                         | < median                             | > median                           |
| Cereals                       | Refined and whole grains                                                                                                                          | < median                             | > median                           |
| Fish                          | Tuna, salmon, fish, prawns, mussel, crab, etc                                                                                                     | < median                             | > median                           |
| <b>Detrimental components</b> |                                                                                                                                                   |                                      |                                    |
| Meat                          | Poultry, bacon, liver, sausages, beef, pork, lamb, etc.                                                                                           | > median                             | < median                           |
| Dairy products                | Milk, cream, ice cream, full-fat yogurt, cheese, butter                                                                                           | > median                             | < median                           |
| Alcohol/Ethanol               | Wine, beer, cider, etc                                                                                                                            | Women <5 or >25g;<br>Men <10 or >50g | Women 5 to 25 g;<br>Men 10 to 50 g |
| Fat intake                    | Ratio of monounsaturated fatty acids to saturated fatty acids                                                                                     | < median                             | > median                           |

**Table S5 Food items of each component of Alternate Mediterranean Diet Index (aMED) and scoring criteria**

| Components                    | Foods                                                                                                          | Scoring 0    | Scoring 1   |
|-------------------------------|----------------------------------------------------------------------------------------------------------------|--------------|-------------|
| <b>Beneficial components</b>  |                                                                                                                |              |             |
| Fruits                        | Apples, bananas, melon, grapefruit, berries, citrus, apricots, fruit cocktail, apple juice, orange juice, etc. | < median     | > median    |
| Nuts                          | Hazelnuts, peanuts, seeds.                                                                                     | < median     | > median    |
| Vegetables                    | Broccoli, cabbage, lettuce, mushrooms, carrots, avocado, potatoes, etc.                                        | < median     | > median    |
| Legumes                       | Tofu, soybeans, beans or lentils and peas                                                                      | < median     | > median    |
| Whole grains                  | Whole grains                                                                                                   | < median     | > median    |
| Fish                          | Tuna, salmon, fish, prawns, mussel, crab, etc                                                                  | < median     | > median    |
| <b>Detrimental components</b> |                                                                                                                |              |             |
| Red meat and processed meat   | Bacon, liver, sausages, beef, pork, lamb, etc.                                                                 | > median     | < median    |
| Alcohol/Ethanol               | Wine, beer, cider, etc                                                                                         | <5 or >25g/d | 5 to 25 g/d |
| Fat intake                    | Ratio of monounsaturated fatty acids to saturated fatty acids                                                  | < median     | > median    |

**Table S6 Spearman correlations between food groups in each dietary pattern and mood**

|                              | Positive Mood           |                | Negative Mood           |                |
|------------------------------|-------------------------|----------------|-------------------------|----------------|
|                              | Correlation Coefficient | <i>p</i> value | Correlation Coefficient | <i>p</i> value |
| PDI_wholegrains              | 0.059                   | 0.284          | -0.087                  | 0.114          |
| PDI_fruits                   | 0.114*                  | 0.037          | 0.005                   | 0.931          |
| PDI_vegetables               | 0.139*                  | 0.011          | -0.066                  | 0.227          |
| PDI_legumes                  | 0.055                   | 0.313          | -0.046                  | 0.409          |
| PDI_vegetable oil            | -0.029                  | 0.594          | 0.007                   | 0.899          |
| PDI_tea & coffee             | 0.083                   | 0.131          | -0.026                  | 0.643          |
| PDI_juice                    | 0.074                   | 0.18           | 0.002                   | 0.968          |
| PDI_refined grains           | -0.018                  | 0.75           | 0.015                   | 0.79           |
| PDI_potato                   | 0.080                   | 0.144          | -0.025                  | 0.655          |
| PDI_sugar beverage           | -0.020                  | 0.722          | 0.070                   | 0.201          |
| PDI_sweets & desserts        | -0.080                  | 0.143          | -0.016                  | 0.768          |
| PDI_animal fat               | -0.023                  | 0.678          | -0.018                  | 0.739          |
| PDI_dairy                    | 0.053                   | 0.338          | -0.032                  | 0.564          |
| PDI_eggs                     | -0.082                  | 0.135          | -0.001                  | 0.986          |
| PDI_fish                     | 0.050                   | 0.366          | -0.066                  | 0.229          |
| PDI_meat                     | -0.020                  | 0.72           | 0.062                   | 0.259          |
| PDI_misc. animal-based foods | 0.002                   | 0.974          | -0.039                  | 0.479          |
| DASH_fruits                  | 0.131*                  | 0.017          | 0.008                   | 0.878          |
| DASH_vegetables              | 0.134*                  | 0.014          | -0.062                  | 0.26           |
| DASH_nuts                    | 0.072                   | 0.188          | -0.069                  | 0.209          |
| DASH_whole grains            | 0.059                   | 0.284          | -0.087                  | 0.114          |
| DASH_low fat dairy           | 0.035                   | 0.520          | 0.017                   | 0.764          |
| DASH_red meat                | -0.022                  | 0.687          | 0.034                   | 0.542          |
| DASH_sweet beverage          | 0.006                   | 0.912          | -0.004                  | 0.947          |
| DASH_sodium                  | 0.098                   | 0.075          | -0.048                  | 0.385          |
| MIND_green vegetables        | 0.096                   | 0.089          | -0.078                  | 0.168          |
| MIND_other vegetables        | 0.139*                  | 0.014          | -0.022                  | 0.694          |
| MIND_berries                 | 0.003                   | 0.951          | -.113*                  | 0.045          |
| MIND_nuts                    | 0.117*                  | 0.038          | -0.063                  | 0.264          |
| MIND_olive oil               | -0.047                  | 0.408          | 0.020                   | 0.727          |
| MIND_butter & margarine      | -0.074                  | 0.192          | -0.018                  | 0.749          |
| MIND_cheese                  | 0.029                   | 0.612          | -0.009                  | 0.878          |
| MIND_whole grains            | 0.061                   | 0.278          | -0.073                  | 0.195          |
| MIND_fish (not fried)        | 0.047                   | 0.410          | -0.055                  | 0.336          |
| MIND_beans                   | 0.062                   | 0.275          | -0.070                  | 0.219          |
| MIND_poultry                 | -0.022                  | 0.698          | 0.008                   | 0.883          |
| MIND_red meat                | -0.041                  | 0.466          | -0.006                  | 0.914          |
| MIND_fast fried foods        | 0.057                   | 0.315          | -0.087                  | 0.125          |
| MIND_pastries & sweets       | -0.062                  | 0.270          | -0.036                  | 0.523          |

|                                                                    | Positive Mood           |                | Negative Mood           |                |
|--------------------------------------------------------------------|-------------------------|----------------|-------------------------|----------------|
|                                                                    | Correlation Coefficient | <i>p</i> value | Correlation Coefficient | <i>p</i> value |
| MIND_wine                                                          | -0.040                  | 0.481          | 0.024                   | 0.677          |
| oMED_vegetables                                                    | 0.152**                 | 0.007          | -0.067                  | 0.236          |
| oMED_legumes                                                       | 0.070                   | 0.217          | -0.053                  | 0.354          |
| oMED_fruits & nuts                                                 | 0.125*                  | 0.026          | -0.026                  | 0.649          |
| oMED_cereals                                                       | 0.001                   | 0.992          | -0.080                  | 0.160          |
| oMED_fish                                                          | 0.048                   | 0.401          | -0.080                  | 0.156          |
| oMED_ratio of monounsaturated fatty acids to saturated fatty acids | 0.150**                 | 0.008          | 0                       | 0.996          |
| oMED_dairy                                                         | 0.030                   | 0.602          | -0.003                  | 0.961          |
| oMED_meat                                                          | -0.033                  | 0.563          | 0.031                   | 0.589          |
| oMED_alcohol                                                       | -0.006                  | 0.915          | -0.015                  | 0.794          |
| aMED_vegetables                                                    | 0.131*                  | 0.020          | -0.061                  | 0.282          |
| aMED_legumes                                                       | 0.070                   | 0.217          | -0.053                  | 0.354          |
| aMED_fruits                                                        | 0.115*                  | 0.042          | -0.021                  | 0.715          |
| aMED_nuts                                                          | 0.112*                  | 0.048          | -0.061                  | 0.284          |
| aMED_whole grains                                                  | 0.068                   | 0.230          | -0.068                  | 0.227          |
| aMED_fish                                                          | 0.048                   | 0.401          | -0.080                  | 0.156          |
| aMED_ratio of monounsaturated fatty acids to saturated fatty acids | 0.150**                 | 0.008          | 0                       | 0.996          |
| aMED_red meat                                                      | -0.032                  | 0.574          | 0.011                   | 0.843          |
| aMED_alcohol                                                       | -0.029                  | 0.613          | -0.044                  | 0.436          |

Note: \**p*<0.05; \*\**p*<0.01. Abbreviations: PDI, Plant-based diet index; hPDI, Healthful Plant-based diet index; uPDI, Unhealthful Plant-based diet index; DASH, Dietary Approaches to Stop Hypertension Diet; MIND, Mediterranean-DASH Intervention for Neurodegenerative Delay (MIND) Diet; oMED, Original Mediterranean Diet Index; aMED, Alternate Mediterranean Diet Index.



**Table S7 PANAS scores by adult participants' characteristics (N=314)**

| <b>Characteristics</b>       | <b>N (%)</b> | <b>Positive Mood<br/>Mean (SD)</b> | <b>Negative Mood<br/>Mean (SD)</b> |
|------------------------------|--------------|------------------------------------|------------------------------------|
| Sex                          |              |                                    |                                    |
| Male                         | 101 (32.2)   | 0.15 (0.95)                        | -0.14 (0.81)                       |
| Female                       | 213 (67.8)   | -0.07 (1.01)                       | 0.07 (1.07)                        |
| Ethnicity                    |              |                                    |                                    |
| White                        | 234 (74.5)   | 0.03 (0.95)                        | -0.04 (0.93)                       |
| Black                        | 11 (3.5)     | 0.76 (0.89)                        | 0.21 (1.25)                        |
| Asian                        | 55 (17.5)    | -0.42 (1.06)                       | 0.17 (1.25)                        |
| Mixed                        | 14 (4.5)     | 0.54 (0.86)                        | -0.12 (0.73)                       |
| Age group                    |              |                                    |                                    |
| 18-25 years                  | 80 (25.5)    | -0.29 (1.02)                       | 0.05 (0.92)                        |
| 26-45 years                  | 105 (33.4)   | -0.08 (0.95)                       | 0.04 (1.04)                        |
| 46-64 years                  | 54 (17.2)    | 0.16 (0.91)                        | -0.01 (1.14)                       |
| >= 65 years                  | 75 (23.9)    | 0.30 (1.01)                        | -0.11 (0.90)                       |
| Smoking history              |              |                                    |                                    |
| Yes                          | 69 (22.0)    | -0.01 (0.86)                       | 0.00 (1.00)                        |
| No                           | 245 (78.0)   | 0.00 (1.03)                        | -0.00 (1.00)                       |
| Alcohol use                  |              |                                    |                                    |
| < 3 units/week               | 202 (64.3)   | -0.01 (1.05)                       | -0.07 (0.97)                       |
| ≥ 3 units/week               | 112 (35.7)   | 0.02 (0.89)                        | 0.12 (1.04)                        |
| BMI                          |              |                                    |                                    |
| Underweight                  | 12 (3.8)     | -0.09 (1.22)                       | 0.18 (1.10)                        |
| Ideal                        | 208 (66.2)   | -0.04 (0.96)                       | 0.01 (0.99)                        |
| Overweight                   | 76 (24.2)    | 0.06 (1.02)                        | -0.14 (0.83)                       |
| Obese                        | 18 (5.7)     | 0.33 (1.16)                        | 0.36 (1.51)                        |
| Physical activity (MET/week) |              |                                    |                                    |
| Low                          | 10 (3.2)     | -0.36 (1.08)                       | -0.22 (0.75)                       |
| Moderate                     | 75 (23.9)    | -0.06 (0.97)                       | -0.00 (1.02)                       |
| High                         | 206 (65.6)   | 0.01 (1.00)                        | 0.02 (1.01)                        |

Note: Abbreviations: PANAS: Positive and Negative Affect Schedule.

**Table S8 Diet pattern scores by adult participants' characteristics (N=314)**

|                   | PDI        |           |         | hPDI       |           |         | uPDI       |           |         | DASH       |           |         |
|-------------------|------------|-----------|---------|------------|-----------|---------|------------|-----------|---------|------------|-----------|---------|
|                   | Mean (SD)  | t/F value | p value | Mean (SD)  | t/F value | p value | Mean (SD)  | t/F value | p value | Mean (SD)  | t/F value | p value |
| Sex               |            | 1.025     | 0.306   |            | -2.571    | 0.011   |            | 2.660     | 0.008   |            | -2.849    | 0.005   |
| Male              | 51.0 (6.9) |           |         | 50.6 (8.4) |           |         | 52.5 (6.9) |           |         | 23.6 (5.3) |           |         |
| Female            | 50.2 (6.1) |           |         | 53.2 (8.0) |           |         | 50.3 (7.1) |           |         | 25.4 (4.5) |           |         |
| Age group         |            | 0.038     | 0.990   |            | 4.371     | 0.005   |            | 6.796     | <0.001  |            | 7.161     | <0.001  |
| 18-25 years       | 50.3 (7.1) |           |         | 50.7 (9.2) |           |         | 51.9 (7.6) |           |         | 23.7 (5.1) |           |         |
| 26-45 years       | 50.5 (5.8) |           |         | 51.6 (8.5) |           |         | 52.6 (6.6) |           |         | 23.9 (5.1) |           |         |
| 46-64 years       | 50.7 (5.9) |           |         | 52.2 (6.7) |           |         | 50.5 (7.4) |           |         | 25.4 (4.2) |           |         |
| >= 65 years       | 50.5 (6.4) |           |         | 55.1 (7.1) |           |         | 48.1 (6.2) |           |         | 26.8 (4.0) |           |         |
| BMI               |            | 0.933     | 0.425   |            | 1.964     | 0.119   |            | 0.177     | 0.912   |            | 0.581     | 0.628   |
| Underweight       | 49.3 (4.4) |           |         | 53.1 (9.2) |           |         | 51.6 (9.6) |           |         | 23.6 (5.1) |           |         |
| Ideal             | 50.7 (6.3) |           |         | 53.0 (8.2) |           |         | 51.0 (7.0) |           |         | 25.0 (4.9) |           |         |
| Overweight        | 50.0 (6.7) |           |         | 50.4 (8.1) |           |         | 50.7 (7.1) |           |         | 24.4 (4.8) |           |         |
| Obese             | 52.1 (6.6) |           |         | 52.0 (7.2) |           |         | 52.0 (7.3) |           |         | 24.9 (4.0) |           |         |
| Physical activity |            | 0.608     | 0.545   |            | 7.214     | 0.001   |            | 5.781     | 0.003   |            | 6.955     | 0.001   |
| Low               | 49.3 (7.5) |           |         | 47.9 (5.7) |           |         | 54.1 (5.2) |           |         | 21.4 (4.1) |           |         |
| Moderate          | 50.1 (6.3) |           |         | 50.0 (7.4) |           |         | 53.3 (6.4) |           |         | 23.4 (5.1) |           |         |
| High              | 50.8 (6.3) |           |         | 53.5 (8.4) |           |         | 50.3 (7.4) |           |         | 25.4 (4.7) |           |         |

Note: Abbreviations: PDI, Plant-based diet index; hPDI, Healthful Plant-based diet index; uPDI, Unhealthful Plant-based diet index; DASH, Dietary Approaches to Stop Hypertension Diet.

**Table S9 Spearman correlations between dietary patterns and adult participants' mood**

|               | PDI    | hPDI  | uPDI   | DASH   |
|---------------|--------|-------|--------|--------|
| Positive mood | 0.090  | 0.051 | -0.102 | 0.132* |
| Negative mood | -0.035 | 0.017 | 0.061  | -0.052 |

Note: Abbreviations: PDI, Plant-based diet index; hPDI, Healthful Plant-based diet index; uPDI, Unhealthful Plant-based diet index; DASH, Dietary Approaches to Stop Hypertension Diet. \* $p < 0.05$ .

**Table S10 Influencing factors of adults' positive mood score: Linear regression analysis**

|                         | Model 1 (PDI)          |          |          | Model 2 (DASH)          |          |          |
|-------------------------|------------------------|----------|----------|-------------------------|----------|----------|
|                         | B (95% CI)             | $\beta$  | <i>p</i> | B (95% CI)              | $\beta$  | <i>p</i> |
| Sex <sup>a</sup>        | -0.225 (-0.457, 0.007) | -0.106   | 0.057    | -0.265 (-0.499, -0.031) | -0.124   | 0.027    |
| Age                     | 0.011 (0.005, 0.016)   | 0.207    | <0.001   | 0.010 (0.004, 0.015)    | 0.184    | 0.001    |
| Diet pattern score      | 0.009 (-0.009, 0.026)  | 0.054    | 0.326    | 0.020 (-0.004, 0.043)   | 0.096    | 0.096    |
| R <sup>2</sup>          |                        | 0.056    |          |                         | 0.062    |          |
| Adjusted R <sup>2</sup> |                        | 0.047    |          |                         | 0.053    |          |
| F                       |                        | 6.165*** |          |                         | 6.805*** |          |

Note: <sup>a</sup> reference group: male; Abbreviations: PDI, Plant-based diet index; DASH, Dietary Approaches to Stop Hypertension Diet. \**p*<0.05; \*\**p*<0.01; \*\*\**p*<0.001.
